# Supplementary material
Source: publisher figshare collection journal article supplement (https://frontiersin.figshare.com/ndownloader/files/27483701)
Supplement: Supplementary file [file 27483701]

Supplementary figure for Xu et al., “Cis-repression of *Foxq1* expression contributes to Foxf2-mediated regulation of palate development”

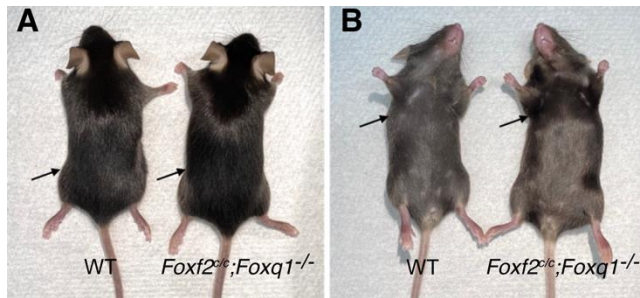

Supplementary Figure 1. *Foxq1* homozygous mutant mice exhibit silky coat.  
(A) Dorsal view of wildtype (WT) and *Foxf2*<sup>c/c</sup>*Foxq1*<sup>D509/D509</sup> homozygous mice.  
(B) Ventral view of wildtype (WT) and *Foxf2*<sup>c/c</sup>*Foxq1*<sup>D509/D509</sup> homozygous mice.
